# Supplementary material for: Time-Dependent Expression Profiles of microRNAs and mRNAs in Rat Milk Whey
Source: PLoS One. 2014 Feb 12;9(2):e88843. doi: 10.1371/journal.pone.0088843 (PMC3923055; doi:10.1371/journal.pone.0088843)
Supplement: Table S3 — Expressed miRNA species and their signal intensities. (XLS) [file pone.0088843.s003.xls]

## Sheet: Expressed miRNAs signal
Table S3. Expressed miRNA species and their signal intensities.
for Fig. 3B Expressed miRNA signal intensity
	Normalized signal intensity												Present or Absent
	day 2 whey			day 9 whey			day 16 whey			serum			day 2 whey			day 9 whey			day 16 whey			serum
SystematicName	sample 1	sample 2	sample 3	sample 1	sample 2	sample 3	sample 1	sample 2	sample 3	sample 1	sample 2	sample 3	sample 1	sample 2	sample 3	sample 1	sample 2	sample 3	sample 1	sample 2	sample 3	sample 1	sample 2	sample 3
rno-let-7a	10.0427	10.2859	10.4673	11.1991	11.0582	11.3721	11.6496	11.6496	11.7962	7.32342	7.23545	7.82156	P	P	P	P	P	P	P	P	P	P	P	P
rno-let-7b	11.7962	11.7962	12.4916	13.1872	13.1872	13.1872	13.1872	13.1872	13.1872	9.28222	9.41329	9.34983	P	P	P	P	P	P	P	P	P	P	P	P
rno-let-7c	11.6496	12.4916	11.7962	12.4916	12.4916	12.4916	12.4916	12.4916	12.4916	8.66041	8.75021	8.82793	P	P	P	P	P	P	P	P	P	P	P	P
rno-let-7d	8.284	8.53395	8.66041	10.0427	10.0427	10.1817	10.3579	10.2859	10.4673	6.63899	6.75844	7.32342	P	P	P	P	P	P	P	P	P	P	P	P
rno-let-7d*	0.994203	1.765	1.71088	1.43804	0.53356	1.61276	0.036484	0.740653	0.53356	0.497024	0.467199	1.765	A	A	A	A	A	A	A	A	A	A	A	P
rno-let-7e	6.14403	6.87004	6.81969	8.284	8.02501	8.53395	8.60629	8.43678	8.75021	4.44181	4.44181	4.21398	P	P	P	P	P	P	P	P	P	P	P	P
rno-let-7f	8.93847	9.57181	9.57181	10.7511	10.4673	11.0582	10.8604	10.6143	10.8604	6.14403	6.18088	6.57711	P	P	P	P	P	P	P	P	P	P	P	P
rno-let-7i	8.53395	8.66041	8.82793	9.57181	9.75631	9.34983	9.75631	9.63805	9.75631	9.34983	8.9979	8.93847	P	P	P	P	P	P	P	P	P	P	P	P
rno-miR-1	0.0559089	0.0340324	0.0727164	0.0317197	0.0124036	0.0598199	0.036484	0.0295555	0.00840309	6.0132	5.78155	3.61491	A	A	A	A	A	A	A	A	A	P	P	P
rno-miR-100	3.79239	2.46004	3.86608	4.21398	4.77228	2.48469	4.16982	3.50654	4.07786	4.4804	4.89551	4.81381	A	A	P	P	P	A	P	P	P	P	P	P
rno-miR-101a	6.70855	6.96244	6.70855	6.24864	6.57711	6.14403	6.44401	6.41305	6.44401	3.01061	1.6723	1.51894	P	P	P	P	P	P	P	P	P	A	A	A
rno-miR-101b	5.94351	6.41305	6.371	6.50176	6.96244	6.75844	6.70855	6.87004	6.91691	3.46263	2.63773	2.96257	P	P	P	P	P	P	P	P	P	P	P	P
rno-miR-103	8.9979	9.41329	9.50205	9.75631	9.41329	9.57181	9.63805	9.50205	9.50205	5.89868	5.6403	5.94351	P	P	P	P	P	P	P	P	P	P	P	P
rno-miR-106b	8.66041	8.60629	8.43678	8.66041	8.43678	8.75021	7.86998	8.284	7.94858	9.15229	8.60629	8.53395	P	P	P	P	P	P	P	P	P	P	P	P
rno-miR-107	9.20341	9.75631	9.63805	10.4673	10.6143	10.8604	10.1817	10.0427	10.0427	8.0779	7.5139	7.71688	P	P	P	P	P	P	P	P	P	P	P	P
rno-miR-10a-5p	2.25779	2.01501	1.56156	2.48469	2.52018	3.20897	2.63773	1.765	2.25779	8.85497	9.28222	9.06898	A	A	A	A	A	P	A	A	A	P	P	P
rno-miR-10b	0.935876	2.08485	2.59686	2.56364	2.38182	4.16982	2.48469	1.20814	0.568481	7.71688	7.94858	8.39046	A	A	A	A	A	P	A	A	A	P	P	P
rno-miR-122	0.0559089	0.0340324	0.0727164	0.0317197	0.89081	1.39058	0.740653	1.71088	2.01501	9.57181	9.50205	10.0427	A	A	A	A	A	A	A	A	A	P	P	P
rno-miR-1224	13.1872	13.1872	13.1872	14.9168	14.9168	14.9168	14.9168	14.9168	14.9168	10.7511	11.6496	11.1991	P	P	P	P	P	P	P	P	P	P	P	P
rno-miR-125a-3p	9.06898	9.06898	8.85497	5.6403	5.55104	5.4398	5.70086	5.70086	5.78155	4.16982	4.01476	4.16982	P	P	P	P	P	P	P	P	P	P	P	P
rno-miR-125a-5p	5.01045	5.36768	5.34403	5.50918	5.08567	5.86769	5.94351	5.36768	5.72585	3.20897	2.96257	3.20897	P	P	P	P	P	P	P	P	P	P	P	P
rno-miR-125b*	0.0559089	1.43804	0.0727164	0.0317197	0.0124036	0.0598199	0.036484	0.0295555	0.00840309	0.00164878	0	0.0216295	A	P	A	A	A	A	A	A	A	A	A	A
rno-miR-125b-3p	6.75844	6.371	6.21895	0.0317197	0.0124036	0.0598199	0.036484	0.0295555	0.00840309	2.77108	0.18891	0.444652	P	P	P	A	A	A	A	A	A	P	P	P
rno-miR-125b-5p	7.07814	6.57711	7.07814	6.87004	6.70855	5.18924	7.07814	6.70855	7.15316	5.70086	5.72585	5.4398	P	P	P	P	P	P	P	P	P	P	P	P
rno-miR-126	0.0559089	0.0340324	0.0727164	0.0317197	0.0124036	0.0598199	0.036484	0.0295555	0.00840309	5.1436	6.0132	5.89868	A	A	A	A	A	A	A	A	A	P	P	P
rno-miR-128	4.60041	4.86206	4.62569	4.86206	5.34403	5.01045	5.1436	5.08567	4.93152	9.50205	8.93847	9.15229	P	P	P	P	P	P	P	P	P	P	P	P
rno-miR-130a	7.63285	7.40187	7.82156	8.43678	8.66041	7.23545	7.63285	7.40187	7.82156	9.41329	9.20341	8.90493	P	P	P	P	P	P	P	P	P	P	P	P
rno-miR-130b	2.1288	2.96257	1.51894	5.01045	4.95757	5.58995	3.1231	4.07786	3.83355	6.70855	6.50176	6.63899	A	A	A	P	P	P	P	P	P	P	P	P
rno-miR-132	0.0559089	0.0340324	0.0727164	0.0317197	0.0124036	0.0598199	0.036484	0.0295555	0.00840309	2.01501	1.80963	2.81955	A	A	A	A	A	A	A	A	A	P	P	P
rno-miR-133a	3.61491	3.42729	3.34687	1.6723	1.51894	1.03373	2.46004	0.798595	0.798595	1.97331	2.19304	1.1423	P	P	P	A	A	A	A	A	A	P	P	A
rno-miR-133b	5.78155	5.34403	5.78155	4.95757	5.36768	2.52018	4.77228	4.24408	4.60041	8.22577	8.39046	6.07774	P	P	P	P	P	A	P	P	P	P	P	P
rno-miR-134	4.95757	4.29031	4.68207	0.994203	2.01501	0.0598199	0.798595	1.80963	1.9264	4.37463	4.4804	4.24408	A	A	P	A	A	A	A	A	A	P	P	P
rno-miR-139-3p	4.0449	1.56156	3.01061	2.7154	2.1288	5.0542	0.036484	1.61276	2.81955	9.75631	10.2859	10.3579	A	A	A	A	A	P	A	A	P	P	P	P
rno-miR-140	3.73872	4.3305	4.54403	5.78155	5.86769	5.70086	5.6403	5.72585	5.82855	7.63285	7.63285	7.5139	A	P	P	P	P	P	P	P	P	P	P	P
rno-miR-140*	3.57827	3.83355	4.50131	4.54403	5.01045	4.62569	4.71206	5.0542	4.68207	8.53395	8.43678	8.60629	P	P	P	P	P	P	P	P	P	P	P	P
rno-miR-141	8.75021	9.50205	9.34983	9.28222	9.28222	9.50205	9.34983	9.75631	9.63805	0.00164878	0.0942633	0.0216295	P	P	P	P	P	P	P	P	P	A	A	A
rno-miR-142-3p	0.0559089	0.0340324	1.33635	3.34687	2.56364	2.90835	2.38182	4.01476	3.55348	2.96257	3.1231	3.42729	A	A	A	A	A	P	A	P	P	P	P	P
rno-miR-142-5p	0.0559089	0.0340324	0.0727164	0.0317197	0.0124036	0.0598199	0.036484	2.81955	0.00840309	4.12278	3.79239	4.07786	A	A	A	A	A	A	A	A	A	P	P	P
rno-miR-143	11.1991	10.8604	11.1991	11.3721	11.7962	9.15229	11.3721	11.0582	11.3721	8.90493	9.15229	8.85497	P	P	P	P	P	P	P	P	P	P	P	P
rno-miR-146a	4.12278	3.90827	4.16982	5.89868	5.50918	6.24864	5.29049	6.96244	5.94351	8.39046	8.0779	8.284	P	P	P	P	P	P	P	P	P	P	P	P
rno-miR-146b	7.94858	8.02501	7.71688	8.39046	7.86998	8.60629	9.06898	9.06898	9.20341	6.44401	5.86769	6.18088	P	P	P	P	P	P	P	P	P	P	P	P
rno-miR-148b-3p	5.36768	5.82855	5.4398	4.4804	4.54403	4.3305	5.34403	5.18924	5.6403	4.50131	4.24408	4.01476	P	P	P	P	P	P	P	P	P	P	P	P
rno-miR-148b-5p	0.0559089	0.0340324	0.0727164	3.38998	1.9264	2.38182	3.01061	2.01501	2.63773	2.56364	2.59686	3.86608	A	A	A	A	A	A	A	A	A	A	P	P
rno-miR-150	0.0559089	0.0340324	0.0727164	0.0317197	0.0124036	0.0598199	0.036484	0.0295555	0.318609	6.91691	7.32342	8.22577	A	A	A	A	A	A	A	A	A	P	P	P
rno-miR-151	6.91691	6.91691	6.96244	8.22577	8.0779	8.39046	8.284	8.02501	8.22577	4.54403	4.62569	4.68207	P	P	P	P	P	P	P	P	P	P	P	P
rno-miR-152	5.89868	6.31147	6.41305	5.86769	6.14403	6.18088	6.371	6.31147	6.70855	3.90827	4.12278	3.38998	P	P	P	P	P	P	P	P	P	P	P	P
rno-miR-15b	8.90493	8.93847	8.90493	9.50205	9.57181	9.75631	9.20341	9.57181	9.34983	9.63805	9.06898	9.28222	P	P	P	P	P	P	P	P	P	P	P	P
rno-miR-16	11.3721	11.3721	11.0582	11.6496	11.6496	11.6496	11.1991	11.3721	11.0582	12.4916	12.4916	12.4916	P	P	P	P	P	P	P	P	P	P	P	P
rno-miR-17-5p	5.50918	5.72585	5.50918	5.58995	5.4398	5.6403	4.62569	4.93152	4.62569	7.07814	6.70855	6.70855	P	P	P	P	P	P	P	P	P	P	P	P
rno-miR-181a	6.81969	7.07814	6.91691	7.32342	7.32342	7.86998	7.23545	7.15316	7.23545	2.90835	3.26055	3.07502	P	P	P	P	P	P	P	P	P	P	P	P
rno-miR-181a*	2.7154	2.7154	2.25779	4.12278	4.29031	4.21398	4.21398	4.62569	4.37463	1.39058	1.61276	0.0216295	A	A	A	P	P	P	P	P	P	A	A	A
rno-miR-181b	3.42729	4.21398	3.79239	1.39058	2.32467	2.77108	0.036484	2.08485	1.86292	2.22088	2.66913	1.97331	A	P	P	A	A	A	A	A	A	A	P	A
rno-miR-181c	6.0132	6.44401	6.52765	5.70086	5.78155	5.50918	5.23851	5.23851	5.23851	4.07786	3.73872	3.73872	P	P	P	P	P	P	P	P	P	P	P	P
rno-miR-181d	3.17776	3.68578	3.55348	2.96257	3.01061	3.86608	1.97331	2.96257	2.7154	4.21398	4.0449	4.29031	A	P	P	A	P	P	A	A	A	P	P	P
rno-miR-182	0.0559089	0.0340324	0.0727164	0.0317197	0.0124036	0.0598199	0.036484	0.0295555	0.00840309	0.00164878	0	0.0216295	A	A	A	A	A	A	A	P	P	A	A	A
rno-miR-183	7.32342	7.15316	7.32342	7.07814	7.23545	7.15316	6.81969	6.63899	6.87004	2.38182	2.22088	3.1231	P	P	P	P	P	P	P	P	P	P	P	P
rno-miR-185	2.29516	3.01061	3.20897	2.42303	3.20897	2.42303	3.55348	3.79239	3.97936	6.87004	6.31147	6.24864	A	A	P	A	P	A	P	P	P	P	P	P
rno-miR-186	4.24408	4.50131	3.97936	5.55104	5.23851	5.08567	5.58995	5.29049	5.86769	4.01476	3.83355	3.97936	P	P	P	P	P	P	P	P	P	P	P	P
rno-miR-188	6.07774	6.07774	6.07774	4.71206	4.86206	4.71206	4.89551	4.89551	4.86206	5.11835	5.11835	5.34403	P	P	P	P	P	P	P	P	P	P	P	P
rno-miR-18a	4.68207	4.12278	4.0449	3.07502	3.61491	3.79239	2.90835	3.64883	2.96257	7.82156	7.15316	7.23545	P	P	P	P	P	P	A	P	P	P	P	P
rno-miR-192	0.0559089	0.994203	2.90835	4.3305	4.62569	4.37463	4.54403	4.4804	4.3305	8.9979	8.90493	9.57181	A	A	A	P	P	P	P	P	P	P	P	P
rno-miR-193	4.93152	5.0542	5.1436	3.55348	4.16982	3.97936	4.3305	4.21398	4.12278	3.50654	2.85939	2.77108	P	P	P	P	P	P	P	P	P	P	P	P
rno-miR-193*	0.0559089	0.0340324	0.0727164	0.0317197	0.0124036	0.0598199	0.036484	1.1423	0.00840309	0.00164878	0	0.0216295	P	A	A	A	A	A	A	A	A	A	A	A
rno-miR-195	7.86998	7.5139	7.86998	8.60629	8.82793	6.91691	8.22577	7.71688	8.02501	5.86769	6.52765	5.50918	P	P	P	P	P	P	P	P	P	P	P	P
rno-miR-196a	3.26055	4.01476	3.07502	4.24408	4.0449	3.17776	3.83355	4.54403	3.90827	1.20814	1.51894	1.6723	A	P	A	P	P	A	A	P	P	A	A	A
rno-miR-196c	4.62569	4.77228	4.86206	3.46263	3.17776	2.32467	2.22088	2.42303	2.42303	1.56156	2.42303	2.25779	P	P	P	P	P	A	A	A	A	A	P	A
rno-miR-199a-3p	3.46263	2.81955	2.96257	3.42729	3.38998	4.95757	2.42303	3.30209	2.32467	7.86998	8.53395	7.86998	A	A	A	A	P	P	A	P	A	P	P	P
rno-miR-199a-5p	0.0559089	0.0340324	0.0727164	0.0317197	0.0124036	0.994203	0.036484	0.0295555	0.00840309	0.53356	2.90835	2.22088	A	A	A	A	A	A	A	A	A	A	P	A
rno-miR-19a	6.63899	6.63899	6.57711	5.11835	5.29049	5.29049	5.4398	5.4398	5.18924	6.41305	6.24864	6.21895	P	P	P	P	P	P	P	P	P	P	P	P
rno-miR-19b	10.7511	10.7511	10.7511	9.20341	8.9979	9.41329	9.28222	9.20341	9.15229	10.1817	10.0427	9.75631	P	P	P	P	P	P	P	P	P	P	P	P
rno-miR-200a	9.63805	10.0427	9.91171	10.1817	10.3579	10.0427	10.2859	10.1817	10.1817	5.36768	3.30209	4.3305	P	P	P	P	P	P	P	P	P	P	P	P
rno-miR-200b	9.57181	9.91171	10.0427	10.2859	10.1817	10.4673	10.4673	10.3579	10.2859	5.55104	4.29031	5.1436	P	P	P	P	P	P	P	P	P	P	P	P
rno-miR-200c	10.8604	11.1991	11.3721	11.7962	11.3721	11.7962	11.7962	11.7962	11.6496	4.95757	4.71206	5.29049	P	P	P	P	P	P	P	P	P	P	P	P
rno-miR-203	1.1423	2.66913	2.81955	2.66913	3.07502	3.26055	2.96257	3.17776	2.90835	3.1231	3.34687	4.12278	A	A	A	A	P	P	A	P	P	P	P	P
rno-miR-204	5.34403	5.18924	5.29049	5.1436	5.82855	4.0449	5.0542	4.77228	5.01045	3.07502	3.57827	4.44181	P	P	P	P	P	P	P	P	P	P	P	P
rno-miR-205	6.41305	6.0132	6.63899	6.0449	6.24864	5.34403	6.14403	5.82855	6.18088	1.03373	2.25779	3.01061	P	P	P	P	P	P	P	P	P	A	P	P
rno-miR-206	0.0559089	0.0340324	0.0727164	0.0317197	2.63773	2.01501	1.29329	3.86608	4.0449	5.08567	5.18924	4.0449	A	A	A	A	A	A	A	P	P	P	P	P
rno-miR-20a	10.4673	10.6143	10.3579	10.3579	10.2859	10.2859	9.41329	9.34983	9.57181	10.3579	10.1817	9.91171	P	P	P	P	P	P	P	P	P	P	P	P
rno-miR-20b-5p	0.0559089	0.0340324	0.0727164	0.0317197	0.0124036	0.0598199	0.036484	0.0295555	0.00840309	2.48469	1.33635	1.86292	A	A	A	A	A	A	A	A	A	P	P	P
rno-miR-21	9.91171	10.1817	10.1817	10.8604	10.8604	10.3579	10.7511	11.1991	10.6143	9.20341	9.34983	9.20341	P	P	P	P	P	P	P	P	P	P	P	P
rno-miR-210	4.01476	4.89551	5.0542	5.18924	5.58995	5.94351	4.44181	4.60041	4.81381	7.94858	7.07814	7.63285	P	P	P	P	P	P	P	P	P	P	P	P
rno-miR-212	10.3579	10.4673	10.6143	4.44181	6.18088	2.08485	6.50176	6.371	4.24408	5.94351	5.89868	6.371	P	P	P	P	P	A	P	P	P	P	P	P
rno-miR-214	2.96257	3.20897	2.48469	3.57827	3.86608	5.11835	3.07502	3.90827	3.30209	8.82793	9.63805	8.9979	A	A	A	A	P	P	A	P	P	P	P	P
rno-miR-215	0.0559089	0.0340324	0.0727164	0.0317197	0.346019	0.0598199	0.036484	0.0295555	1.03373	8.75021	8.85497	9.50205	A	A	A	A	A	A	A	A	A	P	P	P
rno-miR-218	0.0559089	1.33635	1.39058	2.59686	3.50654	3.01061	3.26055	3.55348	3.61491	3.83355	2.7154	1.61276	A	A	A	A	P	A	A	P	P	P	P	A
rno-miR-219-5p	4.3305	4.62569	4.37463	4.29031	4.50131	4.60041	4.60041	4.50131	4.4804	4.0449	3.97936	3.64883	A	P	P	P	P	P	P	P	P	P	P	P
rno-miR-22	10.2859	10.3579	10.2859	11.0582	11.1991	11.1991	11.0582	10.8604	11.1991	10.8604	10.6143	10.6143	P	P	P	P	P	P	P	P	P	P	P	P
rno-miR-221	5.6403	5.1436	5.6403	6.63899	6.81969	5.23851	5.89868	6.07774	6.0132	6.18088	6.14403	6.41305	P	P	P	P	P	P	P	P	P	P	P	P
rno-miR-223	5.72585	5.86769	5.58995	5.08567	5.70086	6.31147	5.11835	8.53395	5.70086	11.6496	11.3721	11.6496	P	P	P	P	P	P	P	P	P	P	P	P
rno-miR-224	2.56364	1.71088	2.38182	4.81381	4.07786	4.86206	6.52765	6.44401	6.31147	1.80963	0.798595	0.89081	A	A	A	P	P	P	P	P	P	A	A	A
rno-miR-23a	8.82793	8.90493	8.9979	8.93847	8.93847	8.82793	8.75021	8.9979	8.93847	11.0582	10.8604	10.8604	P	P	P	P	P	P	P	P	P	P	P	P
rno-miR-23a*	0.0559089	0.0340324	0.0727164	0.0317197	0.0124036	0.0598199	0.036484	0.0295555	0.00840309	0.00164878	0.0336402	0.0216295	A	A	A	A	A	A	A	A	A	A	P	A
rno-miR-23b	7.82156	8.0779	8.02501	8.9979	8.90493	8.93847	8.66041	8.75021	8.9979	8.93847	8.66041	8.66041	P	P	P	P	P	P	P	P	P	P	P	P
rno-miR-24	8.60629	8.284	8.53395	9.06898	9.06898	8.66041	8.93847	8.85497	9.06898	10.6143	10.4673	10.4673	P	P	P	P	P	P	P	P	P	P	P	P
rno-miR-25	9.28222	9.20341	9.28222	9.34983	9.50205	9.63805	8.82793	8.82793	8.39046	10.4673	10.3579	10.2859	P	P	P	P	P	P	P	P	P	P	P	P
rno-miR-26a	8.43678	8.43678	8.60629	8.85497	8.75021	8.9979	9.50205	9.28222	9.28222	6.75844	6.41305	6.50176	P	P	P	P	P	P	P	P	P	P	P	P
rno-miR-26b	8.22577	8.39046	8.39046	9.15229	9.20341	9.20341	9.57181	9.41329	9.41329	7.5139	6.96244	6.87004	P	P	P	P	P	P	P	P	P	P	P	P
rno-miR-27a	8.85497	8.75021	8.75021	7.82156	8.284	7.82156	8.43678	8.60629	8.43678	9.91171	9.75631	9.63805	P	P	P	P	P	P	P	P	P	P	P	P
rno-miR-27b	8.0779	7.94858	8.0779	8.53395	8.39046	7.94858	8.0779	8.0779	8.0779	8.284	8.02501	7.94858	P	P	P	P	P	P	P	P	P	P	P	P
rno-miR-28	4.44181	5.23851	5.18924	6.14403	6.0449	6.0132	6.21895	6.0132	6.24864	2.66913	2.01501	2.1288	P	P	P	P	P	P	P	P	P	P	P	A
rno-miR-290	6.371	5.94351	6.31147	2.81955	2.48469	2.29516	2.1288	2.66913	2.38182	4.60041	5.0542	5.08567	P	P	P	A	A	A	A	A	A	P	P	P
rno-miR-291a-5p	3.01061	3.97936	3.68578	6.52765	6.87004	6.87004	6.41305	6.14403	6.371	0.178857	0.201695	0.0216295	P	P	P	P	P	P	P	P	P	A	A	A
rno-miR-292-5p	4.4804	4.71206	4.71206	3.26055	4.81381	2.46004	5.78155	6.18088	5.58995	3.26055	3.38998	3.46263	P	P	P	P	P	P	P	P	P	P	P	P
rno-miR-294	3.34687	4.93152	3.90827	7.40187	8.22577	8.02501	7.32342	7.23545	7.40187	0.00164878	0	0.0216295	P	P	P	P	P	P	P	P	P	A	A	A
rno-miR-296*	9.15229	8.82793	8.93847	6.75844	6.50176	6.44401	6.75844	6.50176	6.52765	5.72585	6.07774	6.14403	P	P	P	P	P	P	P	P	P	P	P	P
rno-miR-29a	9.34983	9.63805	9.41329	10.6143	10.7511	10.6143	10.6143	10.7511	10.7511	11.3721	11.0582	10.7511	P	P	P	P	P	P	P	P	P	P	P	P
rno-miR-29b	5.18924	5.6403	5.23851	6.31147	6.44401	6.81969	7.5139	7.63285	7.63285	6.21895	6.63899	6.31147	P	P	P	P	P	P	P	P	P	P	P	P
rno-miR-29c	7.15316	7.23545	7.40187	7.71688	7.82156	8.0779	7.94858	8.22577	8.284	8.60629	8.82793	8.43678	P	P	P	P	P	P	P	P	P	P	P	P
rno-miR-29c*	2.38182	2.85939	2.85939	4.07786	3.97936	4.24408	4.0449	3.83355	4.16982	3.34687	3.01061	3.17776	A	A	A	P	P	P	P	P	P	P	P	P
rno-miR-301a	2.77108	2.77108	3.1231	2.08485	2.46004	1.56156	0.036484	2.63773	1.80963	6.31147	5.58995	6.0132	A	A	P	A	P	A	A	P	A	P	P	P
rno-miR-301b	0.0559089	0.0340324	0.0727164	0.0317197	0.0124036	0.0598199	0.036484	0.0295555	0.00840309	0.18891	0	0.0216295	A	A	A	A	A	A	A	A	A	P	A	A
rno-miR-30a	6.18088	6.52765	6.50176	6.91691	6.75844	6.50176	6.91691	6.81969	6.96244	6.24864	6.371	6.0449	P	P	P	P	P	P	P	P	P	P	P	P
rno-miR-30a*	3.97936	4.0449	4.29031	4.77228	4.89551	4.93152	5.18924	5.11835	5.1436	4.71206	4.77228	4.77228	P	P	P	P	P	P	P	P	P	P	P	P
rno-miR-30b-3p	0.0559089	0.0340324	0.0727164	0.0317197	1.09194	1.9264	0.036484	1.33635	1.56156	2.63773	1.29329	0.994203	A	A	A	A	A	A	A	A	A	P	P	A
rno-miR-30b-5p	5.11835	5.29049	4.77228	5.29049	5.11835	5.55104	6.0132	5.89868	5.55104	4.62569	4.50131	4.54403	P	P	P	P	P	P	P	P	P	P	P	P
rno-miR-30c	5.70086	5.78155	5.72585	6.18088	5.89868	5.82855	5.82855	5.58995	5.50918	5.01045	5.08567	5.11835	P	P	P	P	P	P	P	P	P	P	P	P
rno-miR-30c-1*	2.19304	0.0340324	0.0727164	0.0317197	2.25779	0.0598199	1.9264	2.46004	1.765	2.08485	3.42729	2.19304	A	A	A	A	P	A	P	P	P	P	P	P
rno-miR-30c-2*	0.0559089	0.0340324	0.0727164	3.64883	3.79239	4.07786	3.17776	3.38998	3.20897	3.61491	4.3305	3.50654	A	A	A	P	P	P	P	P	P	P	P	P
rno-miR-30d	5.58995	5.58995	5.55104	5.4398	5.1436	5.1436	5.36768	4.95757	5.08567	5.4398	5.36768	5.58995	P	P	P	P	P	P	P	P	P	P	P	P
rno-miR-30e	4.81381	5.11835	5.01045	4.60041	4.93152	4.50131	5.50918	5.34403	5.34403	4.86206	4.86206	4.86206	P	P	P	P	P	P	P	P	P	P	P	P
rno-miR-30e*	0.0559089	1.86292	1.6723	2.52018	2.96257	3.07502	2.85939	3.20897	3.07502	3.30209	3.20897	3.30209	A	A	A	A	P	P	P	P	P	P	P	P
rno-miR-31	7.40187	7.86998	7.5139	7.94858	7.94858	8.22577	8.9979	8.90493	8.90493	0.300464	0.108466	1.29329	P	P	P	P	P	P	P	P	P	A	A	A
rno-miR-320	5.08567	4.81381	5.08567	6.41305	6.21895	6.52765	5.86769	5.6403	6.07774	5.50918	5.23851	5.70086	P	P	P	P	P	P	P	P	P	P	P	P
rno-miR-322	7.23545	7.71688	7.15316	7.23545	7.5139	7.40187	7.40187	7.86998	7.32342	1.33635	1.9264	2.01501	P	P	P	P	P	P	P	P	P	A	P	A
rno-miR-324-3p	5.86769	6.21895	5.94351	6.70855	6.41305	6.57711	6.18088	6.0449	6.21895	5.6403	5.50918	5.82855	P	P	P	P	P	P	P	P	P	P	P	P
rno-miR-324-5p	3.55348	3.34687	3.57827	4.16982	4.4804	3.64883	3.68578	4.0449	4.01476	5.23851	5.29049	5.23851	A	A	P	P	P	P	P	P	P	P	P	P
rno-miR-326	1.61276	0.0340324	0.0727164	0.0317197	0.0124036	0.0598199	0.036484	0.0295555	0.00840309	4.68207	4.60041	5.0542	A	A	A	A	A	A	A	A	A	P	P	P
rno-miR-327	6.96244	6.50176	6.24864	5.34403	6.371	3.83355	6.96244	7.07814	6.63899	6.96244	7.86998	7.07814	P	P	P	P	P	P	P	P	P	P	P	P
rno-miR-328	4.86206	4.54403	4.01476	4.01476	3.46263	3.61491	3.57827	2.90835	3.46263	6.50176	6.21895	8.02501	P	P	P	P	P	P	A	A	P	P	P	P
rno-miR-330*	0.0559089	0.0340324	0.0727164	0.0317197	0.0124036	0.0598199	0.036484	0.0295555	0.00840309	1.71088	0	0.0216295	A	A	A	A	A	A	A	A	A	P	P	P
rno-miR-331	4.50131	4.60041	4.89551	4.89551	4.71206	4.89551	4.68207	4.16982	4.29031	5.34403	5.4398	5.55104	P	P	P	P	P	P	P	P	P	P	P	P
rno-miR-335	0.0559089	0.0340324	0.0727164	0.0317197	0.0124036	0.0598199	0.036484	0.0295555	0.00840309	4.89551	5.01045	4.4804	A	A	A	A	A	A	A	A	A	P	P	P
rno-miR-338	1.33635	0.0340324	0.0727164	0.89081	0.740653	0.0598199	1.765	0.0295555	0.935876	3.55348	3.17776	3.34687	A	A	A	A	A	A	A	A	A	P	P	A
rno-miR-338*	0.0559089	0.0340324	0.0727164	0.0317197	0.0124036	0.0598199	0.036484	0.0295555	0.00840309	2.52018	2.48469	1.20814	A	A	A	A	A	A	A	A	A	P	P	A
rno-miR-340-3p	1.86292	2.19304	2.32467	3.83355	3.73872	3.73872	3.42729	3.68578	3.50654	0.00164878	0.106792	0.467199	A	A	A	P	P	P	P	P	P	A	A	A
rno-miR-340-5p	1.56156	3.17776	2.22088	3.61491	4.12278	4.12278	4.37463	4.71206	4.44181	0.00164878	0	0.0216295	A	A	A	A	P	P	P	P	P	A	A	A
rno-miR-341	5.82855	5.50918	5.86769	0.0317197	0.0124036	0.0598199	0.036484	0.0295555	0.00840309	3.38998	3.55348	2.59686	P	P	P	A	A	A	A	A	A	P	P	A
rno-miR-342-3p	1.03373	0.0340324	1.29329	3.20897	2.19304	2.7154	2.29516	2.29516	2.85939	8.02501	8.284	8.75021	A	A	A	P	A	A	A	A	P	P	P	P
rno-miR-344-3p	0.0559089	0.0340324	0.0727164	0.0317197	0.0124036	0.0598199	0.036484	0.0295555	0.00840309	3.79239	0	0.497024	A	A	A	A	A	A	A	A	A	P	A	A
rno-miR-345-3p	0.0559089	0.0340324	0.0727164	0.0317197	0.0124036	0.0598199	0.036484	0.0295555	0.00840309	0.994203	1.20814	0.0216295	A	A	A	A	A	A	A	A	A	P	P	P
rno-miR-345-5p	6.57711	6.70855	6.44401	6.81969	6.63899	6.63899	6.63899	6.21895	6.41305	5.29049	5.55104	5.6403	P	P	P	P	P	P	P	P	P	P	P	P
rno-miR-347	1.6723	0.0340324	3.26055	0.0317197	0.283178	4.68207	1.80963	3.1231	2.46004	0.121145	0.89081	0.0216295	A	A	P	A	A	P	A	P	P	A	P	A
rno-miR-34a	3.07502	3.30209	3.17776	5.23851	5.18924	6.21895	4.4804	6.57711	5.11835	6.0449	5.94351	5.86769	A	A	A	P	P	P	P	P	P	P	P	P
rno-miR-34b	0.0559089	1.80963	2.1288	1.765	2.77108	2.22088	2.7154	2.48469	3.01061	0.0853737	0.497024	0.0216295	A	A	A	A	P	A	A	P	P	A	A	A
rno-miR-352	0.0559089	0.0340324	0.0727164	4.62569	4.21398	4.81381	4.81381	4.81381	4.71206	0.00164878	0	0.0216295	A	A	A	P	P	P	P	P	P	A	A	A
rno-miR-361	4.71206	4.68207	4.95757	6.21895	6.07774	5.72585	5.55104	5.55104	5.36768	6.81969	6.81969	7.40187	P	P	P	P	P	P	P	P	P	P	P	P
rno-miR-363	0.0559089	0.0340324	0.0727164	1.33635	0.568481	0.0598199	0.036484	1.43804	1.1423	4.3305	4.16982	4.37463	A	A	A	A	A	A	A	A	A	P	P	P
rno-miR-365	6.24864	6.14403	6.18088	6.0132	5.72585	5.78155	6.0449	5.78155	6.0449	4.77228	4.95757	4.89551	P	P	P	P	P	P	P	P	P	P	P	P
rno-miR-370	6.50176	5.55104	6.0132	0.0317197	0.0124036	1.43804	0.036484	0.0295555	0.00840309	5.18924	5.70086	4.95757	P	P	P	A	P	P	A	A	A	P	P	P
rno-miR-375	8.39046	8.22577	8.22577	8.90493	8.85497	9.06898	8.90493	8.66041	8.82793	3.64883	3.90827	5.01045	P	P	P	P	P	P	P	P	P	P	P	P
rno-miR-378	4.37463	4.44181	4.60041	3.1231	3.83355	3.55348	3.38998	3.61491	3.38998	3.68578	3.86608	3.90827	A	P	P	A	P	P	A	P	P	P	P	P
rno-miR-378*	4.16982	4.95757	4.81381	4.93152	4.68207	4.77228	5.08567	4.68207	4.77228	3.42729	3.50654	3.68578	A	P	P	P	P	P	P	P	P	P	P	P
rno-miR-409-3p	4.77228	4.07786	4.93152	2.90835	3.1231	2.96257	2.52018	3.07502	2.52018	2.32467	2.46004	2.85939	A	P	P	A	A	A	A	A	A	A	P	A
rno-miR-425	3.64883	3.46263	3.50654	3.79239	3.64883	3.90827	3.73872	4.37463	3.64883	6.57711	6.44401	6.75844	P	P	P	P	P	P	P	P	P	P	P	P
rno-miR-429	9.41329	9.34983	9.15229	8.75021	8.60629	8.85497	8.85497	8.93847	8.85497	5.78155	4.37463	5.36768	P	P	P	P	P	P	P	P	P	P	P	P
rno-miR-434	2.85939	1.1423	2.19304	1.86292	2.08485	0.0598199	1.71088	0.0295555	0.18891	1.86292	1.43804	2.52018	A	A	A	A	A	A	A	A	A	A	P	A
rno-miR-451	2.01501	1.6723	1.86292	1.29329	1.39058	3.46263	1.09194	0.0295555	0.497024	13.1872	13.1872	13.1872	A	A	A	A	A	P	A	A	A	P	P	P
rno-miR-455	0.0559089	2.38182	1.97331	3.17776	3.57827	3.42729	3.97936	3.97936	4.21398	0.00164878	1.1423	0.0216295	A	A	A	A	A	A	A	P	P	A	A	A
rno-miR-465	0.0559089	2.56364	1.765	1.61276	2.81955	4.01476	2.66913	4.44181	4.54403	4.29031	4.81381	3.83355	A	A	A	A	A	P	A	P	P	P	P	P
rno-miR-466b	8.02501	7.82156	7.23545	8.02501	7.71688	8.90493	8.02501	7.94858	8.53395	6.371	6.91691	6.96244	P	P	P	P	P	P	P	P	P	P	P	P
rno-miR-483	6.21895	6.0449	6.14403	5.0542	4.37463	4.4804	5.01045	4.12278	4.50131	3.86608	4.21398	4.50131	P	P	P	P	P	P	P	P	P	P	P	P
rno-miR-484	5.29049	5.08567	5.11835	3.90827	3.90827	3.68578	4.07786	3.34687	3.68578	4.93152	4.93152	5.18924	P	P	P	P	P	P	P	P	P	P	P	P
rno-miR-494	11.0582	11.0582	10.8604	8.82793	9.15229	8.284	9.15229	9.15229	8.66041	6.07774	8.22577	5.78155	P	P	P	P	P	P	P	P	P	P	P	P
rno-miR-497	7.71688	7.32342	7.94858	8.0779	8.53395	6.96244	7.71688	7.32342	7.5139	7.40187	7.82156	6.91691	P	P	P	P	P	P	P	P	P	P	P	P
rno-miR-500	5.4398	5.4398	5.36768	6.57711	6.52765	6.70855	6.31147	6.24864	6.50176	6.52765	6.57711	6.44401	P	P	P	P	P	P	P	P	P	P	P	P
rno-miR-505	0.0559089	0.0340324	0.0727164	0.0317197	0.0124036	0.0598199	0.036484	0.0295555	0.00840309	1.9264	0.935876	0.798595	A	A	A	A	A	A	A	A	A	P	P	A
rno-miR-532-5p	3.1231	3.26055	3.30209	4.68207	5.0542	5.36768	4.86206	5.01045	4.95757	5.0542	5.1436	4.93152	A	P	P	P	P	P	P	P	P	P	P	P
rno-miR-539	0.0559089	0.0340324	0.0727164	0.0317197	0.0124036	0.0598199	0.036484	1.86292	1.97331	2.85939	3.68578	2.42303	A	A	A	A	A	A	A	A	A	P	P	A
rno-miR-542-3p	0.0559089	2.1288	0.0727164	0.684792	1.80963	2.25779	0.036484	2.19304	0.838766	0.00164878	0	0.0216295	A	A	A	A	A	A	A	P	A	A	A	A
rno-miR-542-5p	5.1436	5.01045	4.44181	4.50131	4.24408	4.54403	3.90827	4.29031	3.86608	4.24408	4.54403	4.60041	P	P	P	P	P	P	P	P	P	P	P	P
rno-miR-652	6.52765	6.81969	6.75844	6.96244	6.91691	7.07814	7.15316	6.91691	6.81969	5.82855	6.0449	6.52765	P	P	P	P	P	P	P	P	P	P	P	P
rno-miR-664	4.54403	4.16982	4.21398	2.63773	3.26055	2.81955	2.01501	2.52018	2.56364	1.51894	2.29516	2.46004	A	P	P	A	A	A	A	A	A	A	A	A
rno-miR-672	2.52018	3.1231	2.77108	3.68578	4.01476	4.44181	4.29031	5.50918	5.89868	4.81381	5.34403	4.71206	A	A	A	A	P	P	P	P	P	P	P	P
rno-miR-674-3p	0.0559089	0.0340324	0.0727164	0.0317197	0.318609	0.0598199	0.036484	0.0295555	0.00840309	3.17776	3.64883	3.57827	A	A	A	A	A	A	A	A	A	P	P	P
rno-miR-685	1.51894	2.22088	1.20814	6.07774	4.60041	6.371	4.24408	4.3305	5.29049	2.19304	3.61491	4.62569	P	P	P	P	P	P	P	P	P	P	P	P
rno-miR-760-3p	3.68578	3.07502	3.61491	0.0317197	3.34687	0.0598199	3.50654	3.26055	3.34687	3.97936	4.68207	3.79239	A	A	A	A	P	A	P	P	P	P	P	P
rno-miR-7a	0.0559089	0.0340324	0.0727164	0.0317197	1.20814	2.19304	1.03373	1.9264	2.1288	0.838766	1.71088	1.9264	A	A	A	A	A	A	A	A	A	A	P	A
rno-miR-7a*	1.97331	2.25779	2.08485	2.25779	2.59686	2.66913	2.59686	2.56364	2.48469	1.29329	0.994203	1.33635	A	A	A	P	P	P	P	P	P	P	P	P
rno-miR-872	3.38998	3.38998	3.64883	3.01061	3.55348	3.30209	3.46263	3.42729	3.26055	3.57827	3.07502	3.26055	A	P	P	A	P	P	A	P	P	P	P	P
rno-miR-874	4.07786	3.57827	3.73872	0.0317197	0.378568	0.0598199	0.036484	0.0295555	0.00840309	1.6723	3.46263	1.80963	P	P	P	A	A	A	A	A	A	P	P	A
rno-miR-877	6.44401	5.70086	5.82855	0.0317197	0.0124036	0.0598199	0.036484	0.0295555	0.00840309	5.58995	5.82855	5.72585	P	P	P	A	A	A	A	A	A	P	P	P
rno-miR-92a	9.50205	8.9979	9.06898	9.63805	9.63805	9.91171	8.53395	8.39046	8.60629	11.7962	11.1991	11.7962	P	P	P	P	P	P	P	P	P	P	P	P
rno-miR-93	6.0449	6.18088	5.89868	5.82855	5.94351	6.0449	4.95757	5.1436	5.0542	8.43678	7.71688	8.0779	P	P	P	P	P	P	P	P	P	P	P	P
rno-miR-96	5.55104	6.24864	6.0449	6.371	6.31147	6.41305	6.87004	6.75844	7.07814	0.00164878	0	0.0216295	P	P	P	P	P	P	P	P	P	A	A	A
rno-miR-98	3.50654	3.55348	4.24408	5.94351	5.6403	5.89868	6.07774	5.94351	6.14403	2.81955	2.56364	2.56364	A	A	P	P	P	P	P	P	P	P	P	A
rno-miR-99a	6.87004	6.75844	6.87004	7.63285	7.63285	7.63285	7.82156	7.5139	7.86998	7.23545	6.87004	6.81969	P	P	P	P	P	P	P	P	P	P	P	P
rno-miR-99b	0.0559089	0.0340324	0.0727164	2.1288	2.42303	2.59686	2.81955	3.46263	2.59686	0.00164878	0	0.0216295	A	A	A	A	A	A	A	P	P	A	A	A
rno-miR-99b*	0.0559089	0.0340324	1.1423	6.44401	6.0132	7.5139	4.93152	4.86206	5.4398	0.444652	1.09194	0.0216295	A	A	A	P	P	P	P	P	P	A	P	A

## Sheet: Venn diagram 1
Table S3. Expressed miRNA species and their signal intensities.
for Fig. 3C Venn diagram (miRNA) (Comparison among day 2, day 9, and day 16 whey sample)
Detected only in day 2 whey	Detected only in day 9 whey	Detected only in day 16 whey	Detected in day 2, day 9, and day 16 whey
12 miRNAs	3 miRNAs	5 miRNAs	113 miRNAs
rno-miR-125b*	rno-miR-10a-5p	rno-miR-99b	rno-let-7a
rno-miR-125b-3p	rno-miR-10b	rno-miR-182	rno-let-7b
rno-miR-133a	rno-miR-451	rno-miR-206	rno-let-7c
rno-miR-134		rno-miR-455	rno-let-7d
rno-miR-181b		rno-miR-542-3p	rno-let-7e
rno-miR-193*			rno-let-7f
rno-miR-290			rno-let-7i
rno-miR-341			rno-miR-15b
rno-miR-409-3p			rno-miR-16
rno-miR-664			rno-miR-17-5p
rno-miR-874			rno-miR-18a
rno-miR-877			rno-miR-19a
			rno-miR-19b
			rno-miR-20a
Detected only in day 2 and day 9 whey	Detected only in day 9 and day 16 whey	Detected only in day 2 and day 16 whey	rno-miR-21
3 miRNAs	25 miRNAs	0 miRNAs	rno-miR-22
rno-miR-181d	rno-miR-7a*		rno-miR-23a
rno-miR-196c	rno-miR-29c*		rno-miR-23b
rno-miR-370	rno-miR-30c-1*		rno-miR-24
	rno-miR-30c-2*		rno-miR-25
	rno-miR-30e*		rno-miR-26a
	rno-miR-34a		rno-miR-26b
	rno-miR-34b		rno-miR-27a
	rno-miR-99b*		rno-miR-27b
	rno-miR-130b		rno-miR-28
	rno-miR-139-3p		rno-miR-29a
	rno-miR-142-3p		rno-miR-29b
	rno-miR-181a*		rno-miR-29c
	rno-miR-192		rno-miR-30a
	rno-miR-199a-3p		rno-miR-30a*
	rno-miR-203		rno-miR-30b-5p
	rno-miR-214		rno-miR-30c
	rno-miR-218		rno-miR-30d
	rno-miR-224		rno-miR-30e
	rno-miR-340-3p		rno-miR-31
	rno-miR-340-5p		rno-miR-92a
	rno-miR-342-3p		rno-miR-93
	rno-miR-352		rno-miR-96
	rno-miR-465		rno-miR-98
	rno-miR-672		rno-miR-99a
	rno-miR-760-3p		rno-miR-100
			rno-miR-101a
			rno-miR-101b
			rno-miR-103
			rno-miR-106b
			rno-miR-107
			rno-miR-125a-3p
			rno-miR-125a-5p
			rno-miR-125b-5p
			rno-miR-128
			rno-miR-130a
			rno-miR-133b
			rno-miR-140
			rno-miR-140*
			rno-miR-141
			rno-miR-143
			rno-miR-146a
			rno-miR-146b
			rno-miR-148b-3p
			rno-miR-151
			rno-miR-152
			rno-miR-181a
			rno-miR-181c
			rno-miR-183
			rno-miR-185
			rno-miR-186
			rno-miR-188
			rno-miR-193
			rno-miR-195
			rno-miR-196a
			rno-miR-200a
			rno-miR-200b
			rno-miR-200c
			rno-miR-204
			rno-miR-205
			rno-miR-210
			rno-miR-212
			rno-miR-219-5p
			rno-miR-221
			rno-miR-223
			rno-miR-291a-5p
			rno-miR-292-5p
			rno-miR-294
			rno-miR-296*
			rno-miR-301a
			rno-miR-320
			rno-miR-322
			rno-miR-324-3p
			rno-miR-324-5p
			rno-miR-327
			rno-miR-328
			rno-miR-331
			rno-miR-345-5p
			rno-miR-347
			rno-miR-361
			rno-miR-365
			rno-miR-375
			rno-miR-378
			rno-miR-378*
			rno-miR-425
			rno-miR-429
			rno-miR-466b
			rno-miR-483
			rno-miR-484
			rno-miR-494
			rno-miR-497
			rno-miR-500
			rno-miR-532-5p
			rno-miR-542-5p
			rno-miR-652
			rno-miR-685
			rno-miR-872
			rno-miR-1224

## Sheet: Venn diagram 2
Table S3. Expressed miRNA species and their signal intensities.
for Fig. 3D Venn diagram (miRNA) (Comparison between whey and serum)
Detected only in whey	Detected common in whey and serum
20 miRNAs	141 miRNAs
rno-miR-31	rno-let-7a
rno-miR-34b	rno-let-7b
rno-miR-96	rno-let-7c
rno-miR-99b	rno-let-7d
rno-miR-101a	rno-let-7e
rno-miR-125b*	rno-let-7f
rno-miR-141	rno-let-7i
rno-miR-181a*	rno-miR-7a*
rno-miR-182	rno-miR-10a-5p
rno-miR-193*	rno-miR-10b
rno-miR-196a	rno-miR-15b
rno-miR-224	rno-miR-16
rno-miR-291a-5p	rno-miR-17-5p
rno-miR-294	rno-miR-18a
rno-miR-340-3p	rno-miR-19a
rno-miR-340-5p	rno-miR-19b
rno-miR-352	rno-miR-20a
rno-miR-455	rno-miR-21
rno-miR-542-3p	rno-miR-22
rno-miR-664	rno-miR-23a
	rno-miR-23b
	rno-miR-24
Detected only in serum	rno-miR-25
27 miRNAs	rno-miR-26a
rno-let-7d*	rno-miR-26b
rno-miR-1	rno-miR-27a
rno-miR-7a	rno-miR-27b
rno-miR-20b-5p	rno-miR-28
rno-miR-23a*	rno-miR-29a
rno-miR-30b-3p	rno-miR-29b
rno-miR-122	rno-miR-29c
rno-miR-126	rno-miR-29c*
rno-miR-132	rno-miR-301a
rno-miR-142-5p	rno-miR-30a
rno-miR-148b-5p	rno-miR-30a*
rno-miR-150	rno-miR-30b-5p
rno-miR-199a-5p	rno-miR-30c
rno-miR-215	rno-miR-30c-1*
rno-miR-301b	rno-miR-30c-2*
rno-miR-326	rno-miR-30d
rno-miR-330*	rno-miR-30e
rno-miR-335	rno-miR-30e*
rno-miR-338	rno-miR-34a
rno-miR-338*	rno-miR-92a
rno-miR-344-3p	rno-miR-93
rno-miR-345-3p	rno-miR-98
rno-miR-363	rno-miR-99a
rno-miR-434	rno-miR-99b*
rno-miR-505	rno-miR-100
rno-miR-539	rno-miR-101b
rno-miR-674-3p	rno-miR-103
	rno-miR-106b
	rno-miR-107
	rno-miR-125a-3p
	rno-miR-125a-5p
	rno-miR-125b-3p
	rno-miR-125b-5p
	rno-miR-128
	rno-miR-130a
	rno-miR-130b
	rno-miR-133a
	rno-miR-133b
	rno-miR-134
	rno-miR-139-3p
	rno-miR-140
	rno-miR-140*
	rno-miR-142-3p
	rno-miR-143
	rno-miR-146a
	rno-miR-146b
	rno-miR-148b-3p
	rno-miR-151
	rno-miR-152
	rno-miR-181a
	rno-miR-181b
	rno-miR-181c
	rno-miR-181d
	rno-miR-183
	rno-miR-185
	rno-miR-186
	rno-miR-188
	rno-miR-192
	rno-miR-193
	rno-miR-195
	rno-miR-196c
	rno-miR-199a-3p
	rno-miR-200a
	rno-miR-200b
	rno-miR-200c
	rno-miR-203
	rno-miR-204
	rno-miR-205
	rno-miR-206
	rno-miR-210
	rno-miR-212
	rno-miR-214
	rno-miR-218
	rno-miR-219-5p
	rno-miR-221
	rno-miR-223
	rno-miR-290
	rno-miR-292-5p
	rno-miR-296*
	rno-miR-320
	rno-miR-322
	rno-miR-324-3p
	rno-miR-324-5p
	rno-miR-327
	rno-miR-328
	rno-miR-331
	rno-miR-341
	rno-miR-342-3p
	rno-miR-345-5p
	rno-miR-347
	rno-miR-361
	rno-miR-365
	rno-miR-370
	rno-miR-375
	rno-miR-378
	rno-miR-378*
	rno-miR-409-3p
	rno-miR-425
	rno-miR-429
	rno-miR-451
	rno-miR-465
	rno-miR-466b
	rno-miR-483
	rno-miR-484
	rno-miR-494
	rno-miR-497
	rno-miR-500
	rno-miR-532-5p
	rno-miR-542-5p
	rno-miR-652
	rno-miR-672
	rno-miR-685
	rno-miR-760-3p
	rno-miR-872
	rno-miR-874
	rno-miR-877
	rno-miR-1224
